# Supplementary material for: Neutrophil and macrophage apoptosis in bronchoalveolar lavage fluid from healthy horses and horses with recurrent airway obstruction (RAO)
Source: PubMed Central journal article supplement (PMC3903020; doi:10.1186/1746-6148-10-29), 2014-01-24
Supplement: 1746-6148-10-29-S1.pdf [file 1746-6148-10-29-S1.pdf]

1 Additional file 1: Table S1

2 Modified clinical staging of RAO in horses according to Tilley et al [18]

| Parameter                                | 0           | 1                                                                | 2                                                                                                                          | 3                                                                                                             | 4                   | 5                        |
|------------------------------------------|-------------|------------------------------------------------------------------|----------------------------------------------------------------------------------------------------------------------------|---------------------------------------------------------------------------------------------------------------|---------------------|--------------------------|
| <b>Clinical assessment<sup>a</sup></b>   |             |                                                                  |                                                                                                                            |                                                                                                               |                     |                          |
| <i>Cough score</i>                       | None        | Coughs on specific times of day (feeding/exercising/making beds) | Frequent cough with periods of no coughing                                                                                 | Very frequent cough                                                                                           |                     |                          |
| <i>Nostril flare</i>                     | None        | Flares during inspiration (returns to normal at end inspiration) | Flares in inspiration and exhalation (slight movement can still be seen)                                                   | Flares in inspiration and expiration (no movement can be seen)                                                |                     |                          |
| <i>Abdominal lift</i>                    | None        | Slight flattening of ventral flank                               | Obvious abdominal flattening and "heave line" extending no more than half way between cubital joint and <i>tuber coxae</i> | Obvious abdominal lift and "heave line" extending beyond halfway between cubital joint and <i>tuber coxae</i> |                     |                          |
| <b>Airway endoscopy<sup>b</sup></b>      |             |                                                                  |                                                                                                                            |                                                                                                               |                     |                          |
| <i>Mucus accumulation</i>                | None, clean | Little, multiple small blobs                                     | Moderate, larger blobs                                                                                                     | Marked, confluent or stream-forming                                                                           | Large, pool-forming | Extreme, profuse amounts |
| <i>Mucus color</i>                       | None, clean | Colorless                                                        | White                                                                                                                      | Thick White                                                                                                   | Yellow              | Thick Yellow             |
| <i>Mucus localization and stickiness</i> | None, clean | 1/2 Ventral                                                      | 2/3 Lateral                                                                                                                | 3/4 Dorsal                                                                                                    | Threading           | Threading                |
| <i>Mucus apparent viscosity</i>          | None, clean | Very fluid                                                       | Fluid                                                                                                                      | Intermediate                                                                                                  | Viscous             | Very viscous             |

3 <sup>a</sup> Final Clinical Score (CS): **0** (CS final score < 2), **1** (2 ≤ CS final score ≤ 4) **2** (5 ≤ CS final score ≤ 6) **3** (7 ≤ CS  
4 final score ≤ 9)

5 <sup>b</sup> Final airway Endoscopy Score: **0** (ES final score < 8.5) **1** (8.5 ≤ ES final score ≤ 12) **2** (12 < ES final score ≤  
6 16) **3** (ES final score > 16)

7 **Final RAO Stage:**

8 **Stage 0 – No RAO (Total Score = 0);**

9 **Stage 1 – Mild RAO (1 ≤ Total Score < 2);**

10  
11  
12

**Stage 2 – Moderate RAO ( 3 ≤ Total Score ≤ 4);**

**Stage 3 – Severe RAO ( 5 ≤ Total Score = 6)**
